# Supplementary material for: Hepatitis B virus infection and vaccine-induced immunity: the role of sociodemographic determinants: Results of the study “German Health Interview and Examination Survey for Adults” (DEGS1, 2008–2011)
Source: Bundesgesundheitsblatt Gesundheitsforschung Gesundheitsschutz. 2021 Dec 27;65(2):159–69. [Article in German] doi: 10.1007/s00103-021-03473-z (PMC8813829; doi:10.1007/s00103-021-03473-z)
Supplement: Supplementary file 1 [file 103_2021_3473_MOESM1_ESM.pdf]

Onlinematerial zum Beitrag:

## **Hepatitis-B-Virus-Infektionen und impfinduzierte Immunität: die Rolle von soziodemografischen Determinanten. Ergebnisse der „Studie zur Gesundheit Erwachsener in Deutschland“ (DEGS1, 2008-2011)**

Annika Brodzinski<sup>1</sup>, Angela Neumeyer-Gromen<sup>2</sup>, Sandra Dudareva<sup>3</sup>, Ruth Zimmermann<sup>3</sup>, Ute Latza<sup>4</sup>, Viviane Bremer<sup>3</sup>, Christina Poethko-Müller<sup>5</sup>

<sup>1</sup> Charité – Universitätsmedizin Berlin (Institut für Hygiene und Umweltmedizin), Berlin, Deutschland

<sup>2</sup> Deutsche Krankenhausgesellschaft e.V. (DKG), Berlin, Deutschland

<sup>3</sup> Robert Koch-Institut (Abteilung für Infektionsepidemiologie), Berlin, Deutschland

<sup>4</sup> Bundesanstalt für Arbeitsschutz und Arbeitsmedizin (BAuA, Fachbereich Arbeit und Gesundheit), Berlin, Deutschland

<sup>5</sup> Robert Koch-Institut (Abteilung für Epidemiologie und Gesundheitsmonitoring), Berlin, Deutschland

### **Korrespondenzadresse**

Dr. Christina Poethko-Müller, MSc.  
Robert Koch-Institut  
Abteilung für Epidemiologie und Gesundheitsmonitoring  
FG 25 Körperliche Gesundheit  
General-Pape-Straße 62-66  
12101 Berlin  
Deutschland  
[poethko-mueller@rki.de](mailto:poethko-mueller@rki.de)

### **Inhalt:**

**Tabelle Z1.** Ausgewählte Berufe des Gesundheitswesens mit erhöhtem Risiko für eine berufliche Exposition gegenüber dem Hepatitis-B-Virus

**Tabelle Z1.** Ausgewählte Berufe des Gesundheitswesens mit erhöhtem Risiko für eine berufliche Exposition gegenüber dem Hepatitis-B-Virus

| Kurz-<br>bezeichnung | Langbezeichnung                                                                                                           |
|----------------------|---------------------------------------------------------------------------------------------------------------------------|
| 8110                 | Medizinische Fachangestellte (ohne Spezialisierung)                                                                       |
| 81102                | Medizinische Fachangestellte (ohne Spezialisierung) – fachlich ausgerichtete Tätigkeiten                                  |
| 81103                | Medizinische Fachangestellte (ohne Spezialisierung) – komplexe Spezialistentätigkeiten                                    |
| 8111                 | Zahnmedizinische Fachangestellte                                                                                          |
| 81112                | Zahnmedizinische Fachangestellte – fachlich ausgerichtete Tätigkeiten                                                     |
| 81113                | Zahnmedizinische Fachangestellte – komplexe Spezialistentätigkeiten                                                       |
| 8112                 | Podologen/Podologinnen                                                                                                    |
| 81122                | Podologen/Podologinnen – fachlich ausgerichtete Tätigkeiten                                                               |
| 8118                 | Medizinische Fachangestellte (sonstige spezifische Tätigkeitsangabe)                                                      |
| 81182                | Medizinische Fachangestellte (sonstige spezifische Tätigkeitsangabe) – fachlich ausgerichtete Tätigkeiten                 |
| 81183                | Medizinische Fachangestellte (sonstige spezifische Tätigkeitsangabe) – komplexe Spezialistentätigkeiten                   |
| 813                  | Gesundheits- und Krankenpflege, Rettungsdienst und Geburtshilfe                                                           |
| 8130                 | Berufe in der Gesundheits- und Krankenpflege (ohne Spezialisierung)                                                       |
| 81301                | Berufe in der Gesundheits- und Krankenpflege (ohne Spezialisierung) – Helfer-/Anlernertätigkeiten                         |
| 81302                | Berufe in der Gesundheits- und Krankenpflege (ohne Spezialisierung) – fachlich ausgerichtete Tätigkeiten                  |
| 8131                 | Berufe in der Fachkrankenpflege                                                                                           |
| 81313                | Berufe in der Fachkrankenpflege – komplexe Spezialistentätigkeiten                                                        |
| 8132                 | Berufe in der Fachkinderkrankenpflege                                                                                     |
| 81323                | Berufe in der Fachkinderkrankenpflege – komplexe Spezialistentätigkeiten                                                  |
| 8133                 | Berufe in der operations-/medizintechnischen Assistenz                                                                    |
| 81332                | Berufe in der operations-/medizintechnischen Assistenz – fachlich ausgerichtete Tätigkeiten                               |
| 81333                | Berufe in der operations-/medizintechnischen Assistenz – komplexe Spezialistentätigkeiten                                 |
| 8134                 | Berufe im Rettungsdienst                                                                                                  |
| 81341                | Berufe im Rettungsdienst – Helfer-/Anlernertätigkeiten                                                                    |
| 81342                | Berufe im Rettungsdienst – fachlich ausgerichtete Tätigkeiten                                                             |
| 81343                | Berufe im Rettungsdienst – komplexe Spezialistentätigkeiten                                                               |
| 8135                 | Berufe in der Geburtshilfe und Entbindungspflege                                                                          |
| 81352                | Berufe in der Geburtshilfe und Entbindungspflege – fachlich ausgerichtete Tätigkeiten                                     |
| 81353                | Berufe in der Geburtshilfe und Entbindungspflege – komplexe Spezialistentätigkeiten                                       |
| 8138                 | Berufe in der Gesundheits- und Krankenpflege (sonstige spezifische Tätigkeitsangabe)                                      |
| 81382                | Berufe in der Gesundheits- und Krankenpflege (sonstige spezifische Tätigkeitsangabe) – fachlich ausgerichtete Tätigkeiten |
| 81383                | Berufe in der Gesundheits- und Krankenpflege (sonstige spezifische Tätigkeitsangabe) – komplexe Spezialistentätigkeiten   |
| 8139                 | Aufsichts- und Führungskräfte – Gesundheits- und Krankenpflege, Rettungsdienst und Geburtshilfe                           |

|       |                                                                                                                               |
|-------|-------------------------------------------------------------------------------------------------------------------------------|
| 81393 | Aufsichtskräfte – Gesundheits- und Krankenpflege, Rettungsdienst und Geburtshilfe                                             |
| 81394 | Führungskräfte – Gesundheits- und Krankenpflege, Rettungsdienst und Geburtshilfe                                              |
| 814   | Human- und Zahnmedizin                                                                                                        |
| 8140  | Ärzte/Ärztinnen (ohne Spezialisierung)                                                                                        |
| 81404 | Ärzte/Ärztinnen (ohne Spezialisierung) - hoch komplexe Tätigkeiten                                                            |
| 8141  | Fachärzte/-ärztinnen in der Kinder- und Jugendmedizin                                                                         |
| 81414 | Fachärzte/-ärztinnen in der Kinder- und Jugendmedizin – hoch komplexe Tätigkeiten                                             |
| 8142  | Fachärzte/-ärztinnen in der Inneren Medizin                                                                                   |
| 81424 | Fachärzte/-ärztinnen in der Inneren Medizin – hoch komplexe Tätigkeiten                                                       |
| 8143  | Fachärzte/-ärztinnen in der Chirurgie                                                                                         |
| 81434 | Fachärzte/-ärztinnen in der Chirurgie – hoch komplexe Tätigkeiten                                                             |
| 8144  | Fachärzte/-ärztinnen in den Bereichen Hautkrankheiten, Sinnes- und Geschlechtsorgane                                          |
| 81444 | Fachärzte/-ärztinnen in den Bereichen Hautkrankheiten, Sinnes- und Geschlechtsorgane – hoch komplexe Tätigkeiten              |
| 8145  | Fachärzte/-ärztinnen in der Anästhesiologie                                                                                   |
| 81454 | Fachärzte/-ärztinnen in der Anästhesiologie – hoch komplexe Tätigkeiten                                                       |
| 8146  | Fachärzte/-ärztinnen in der Neurologie, Psychiatrie, Psychotherapie und psychosomatischen Medizin                             |
| 81464 | Fachärzte/-ärztinnen in der Neurologie, Psychiatrie, Psychotherapie und psychosomatischen Medizin – hoch komplexe Tätigkeiten |
| 8147  | Zahnärzte/-ärztinnen und Kieferorthopäden/-orthopädinnen                                                                      |
| 81474 | Zahnärzte/-ärztinnen und Kieferorthopäden/-orthopädinnen – hoch komplexe Tätigkeiten                                          |
| 8148  | Ärzte/Ärztinnen (sonstige spezifische Tätigkeitsangabe)                                                                       |
| 81484 | Ärzte/Ärztinnen (sonstige spezifische Tätigkeitsangabe) – hoch komplexe Tätigkeiten                                           |
| 8149  | Führungskräfte – Human- und Zahnmedizin                                                                                       |
| 81494 | Führungskräfte – Human- und Zahnmedizin                                                                                       |
| 821   | Altenpflege                                                                                                                   |
| 8210  | Berufe in der Altenpflege (ohne Spezialisierung)                                                                              |
| 82101 | Berufe in der Altenpflege (ohne Spezialisierung) – Helfer-/Anlernertätigkeiten                                                |
| 82102 | Berufe in der Altenpflege (ohne Spezialisierung) – fachlich ausgerichtete Tätigkeiten                                         |
| 82103 | Berufe in der Altenpflege (ohne Spezialisierung) – komplexe Spezialistentätigkeiten                                           |
| 8218  | Berufe in der Altenpflege (sonstige spezifische Tätigkeitsangabe)                                                             |
| 82182 | Berufe in der Altenpflege (sonstige spezifische Tätigkeitsangabe) – fachlich ausgerichtete Tätigkeiten                        |
| 82183 | Berufe in der Altenpflege (sonstige spezifische Tätigkeitsangabe) – komplexe Spezialistentätigkeiten                          |
| 8219  | Führungskräfte - Altenpflege                                                                                                  |
| 82194 | Führungskräfte - Altenpflege                                                                                                  |

---

Adaptiert nach der "Klassifikation der Berufe 2010" der Bundesagentur für Arbeit [1].

---

#### Literaturverzeichnis

1. Bundesagentur für Arbeit (2013) Klassifikation der Berufe 2010 - Systematisches Verzeichnis. <https://statistik.arbeitsagentur.de/Statistischer-Content/Grundlagen/Klassifikationen/Klassifikation-der-Berufe/KldB2010/Systematik-Verzeichnisse/Generische-Publikationen/Systematisches-Verzeichnis-Berufsbenennung.xls>. Zugriffen: 28.06.2021
